# Supplementary material for: Sonographic Features Differentiating Follicular Thyroid Cancer from Follicular Adenoma–A Meta-Analysis
Source: PubMed Central journal article supplement (PMC7956257; doi:10.3390/cancers13050938), 2021-02-24
Supplement: cancers-13-00938-s001.pdf [file cancers-13-00938-s001.pdf]

# Supplementary materials: Sonographic Features Differentiating Follicular Thyroid Cancer from Follicular Adenoma–A Meta-Analysis

Martyna Borowczyk, Kosma Woliński, Barbara Więckowska, Elżbieta Jodłowska-Siewert, Ewelina Szczepanek-Parulska, Frederik A. Verburg and Marek Ruchała

Table S1a. The results of odds ratios (OR) of each study in increasing the risk of nodule malignancy for tumor protrusion with 95% confidence intervals and forest plots.

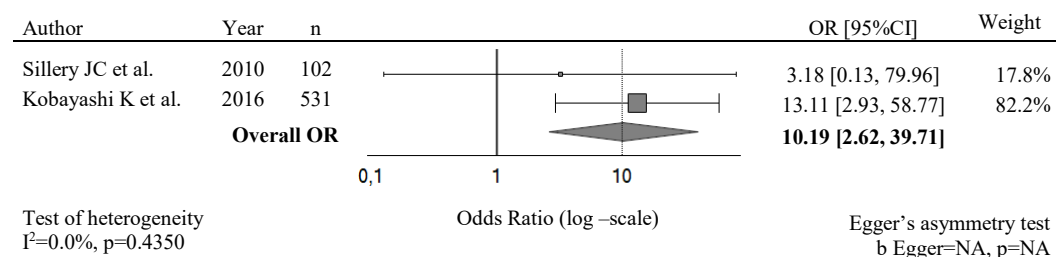

NA- not applicable (too few data)

Table S1b. The number of patients with true positive (TP), false negative (FN), false positive (FP), and true negative (TN) results presenting the estimates of sensitivity, specificity, positive predictive value (PPV), and negative predictive value (NPV with 95% confidence intervals of each study for tumor protrusion.

| Author                                            | Year | n   | TP | FN  | FP | TN  | Sensitivity [95%CI]      | Specificity [95%CI]      | PPV [95%CI]             | NPV [95%CI]              |
|---------------------------------------------------|------|-----|----|-----|----|-----|--------------------------|--------------------------|-------------------------|--------------------------|
| Sillery JC et al.                                 | 2010 | 102 | 1  | 49  | 0  | 52  | 0.02 [0.00, 0.11]        | 1.00 [0.93, 1.00]        | 1.00 [0.02, 1.00]       | 0.51 [0.41, 0.62]        |
| Kobayashi K et al.                                | 2016 | 531 | 13 | 171 | 2  | 345 | 0.07 [0.04, 0.12]        | 0.99 [0.98, 1.00]        | 0.87 [0.6, 0.98]        | 0.67 [0.63, 0.71]        |
| <b>Overall sensitivity, specificity, PPV, NPV</b> |      |     |    |     |    |     | <b>0.06 [0.03, 0.09]</b> | <b>1.00 [0.99, 1.00]</b> | <b>0.96 [0.7, 1.00]</b> | <b>0.64 [0.61, 0.68]</b> |

HSROC overall sensitivity and specificity are missing because HSROC requires a minimum of four studies

Table S2a. The results of odds ratios (OR) of each study in increasing the risk of nodule malignancy when microcalcifications or mixed type (coexisting micro- and macrocalcifications) are present in the ultrasound with 95% confidence intervals and forest plots.

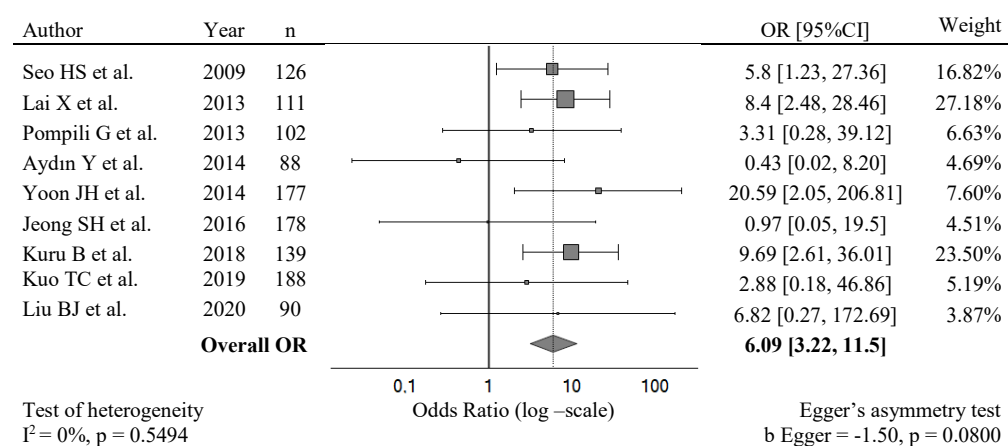

Table S2b. The number of patients with true positive (TP), false negative (FN), false positive (FP), and true negative (TN) results presenting the estimates of sensitivity, specificity, positive predictive value (PPV), and negative predictive value (NPV with 95% confidence intervals of each study for microcalcifications or mixed type (coexisting micro- and macrocalcifications) in the ultrasound.

| Author                                            | Year | n   | TP | FN | FP | TN  | Sensitivity [95%CI]      | Specificity [95%CI]      | PPV [95%CI]              | NPV [95%CI]              |
|---------------------------------------------------|------|-----|----|----|----|-----|--------------------------|--------------------------|--------------------------|--------------------------|
| Seo HS et al.                                     | 2009 | 126 | 11 | 55 | 2  | 58  | 0.17 [0.09, 0.28]        | 0.97 [0.88, 1.00]        | 0.85 [0.55, 0.98]        | 0.51 [0.42, 0.61]        |
| Lai X et al.                                      | 2013 | 111 | 12 | 25 | 4  | 70  | 0.32 [0.18, 0.50]        | 0.95 [0.87, 0.99]        | 0.75 [0.48, 0.93]        | 0.74 [0.64, 0.82]        |
| Pompili G et al.                                  | 2013 | 102 | 1  | 13 | 2  | 86  | 0.07 [0.00, 0.34]        | 0.98 [0.92, 1.00]        | 0.33 [0.01, 0.91]        | 0.87 [0.79, 0.93]        |
| Aydin Y et al.                                    | 2014 | 88  | 0  | 6  | 12 | 70  | 0.00 [0.00, 0.46]        | 0.85 [0.76, 0.92]        | 0.00 [0.00, 0.26]        | 0.92 [0.84, 0.97]        |
| Yoon JH et al.                                    | 2014 | 177 | 3  | 22 | 1  | 151 | 0.12 [0.03, 0.31]        | 0.99 [0.96, 1.00]        | 0.75 [0.19, 0.99]        | 0.87 [0.81, 0.92]        |
| Jeong SH et al.                                   | 2016 | 178 | 0  | 22 | 3  | 153 | 0.00 [0.00, 0.15]        | 0.98 [0.94, 1.00]        | 0.00 [0.00, 0.71]        | 0.87 [0.82, 0.92]        |
| Kuru B et al.                                     | 2018 | 139 | 13 | 38 | 3  | 85  | 0.25 [0.14, 0.40]        | 0.97 [0.90, 0.99]        | 0.81 [0.54, 0.96]        | 0.69 [0.60, 0.77]        |
| Kuo TC et al.                                     | 2019 | 188 | 1  | 48 | 1  | 138 | 0.02 [0.00, 0.11]        | 0.99 [0.96, 1.00]        | 0.50 [0.01, 0.99]        | 0.74 [0.67, 0.80]        |
| Liu BJ et al.                                     | 2020 | 90  | 1  | 27 | 0  | 62  | 0.04 [0.00, 0.18]        | 1.00 [0.94, 1.00]        | 1.00 [0.02, 1.00]        | 0.70 [0.59, 0.79]        |
| <b>Overall sensitivity, specificity, PPV, NPV</b> |      |     |    |    |    |     | <b>0.10 [0.03, 0.19]</b> | <b>0.97 [0.95, 0.99]</b> | <b>0.53 [0.19, 0.86]</b> | <b>0.78 [0.69, 0.85]</b> |

HSROC overall sensitivity [95%CI] = 0.1 [0.04, 0.21], HSROC overall specificity [95%CI] = 0.98 [0.95, 0.99]

Table S3a. The results of odds ratios (OR) of each study in increasing the risk of nodule malignancy for irregular margins with 95% confidence intervals and forest plots.

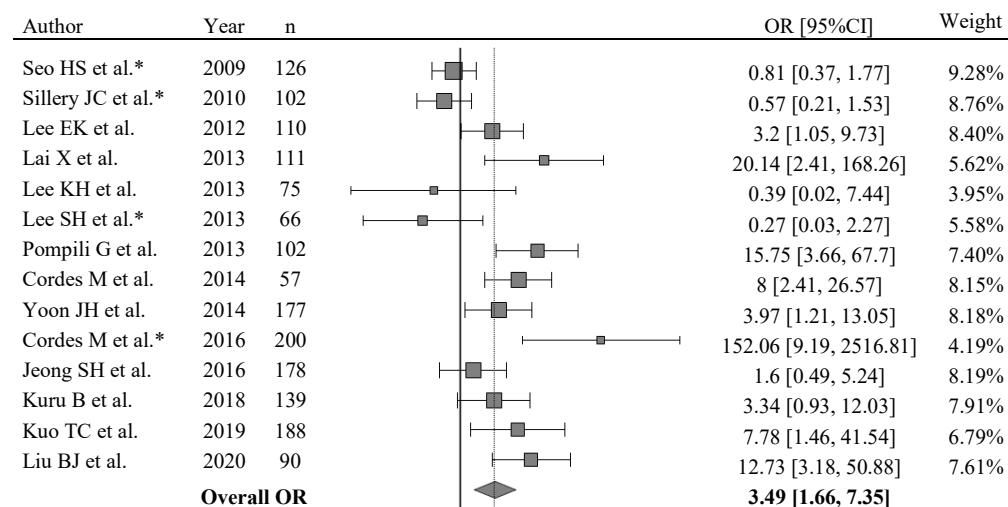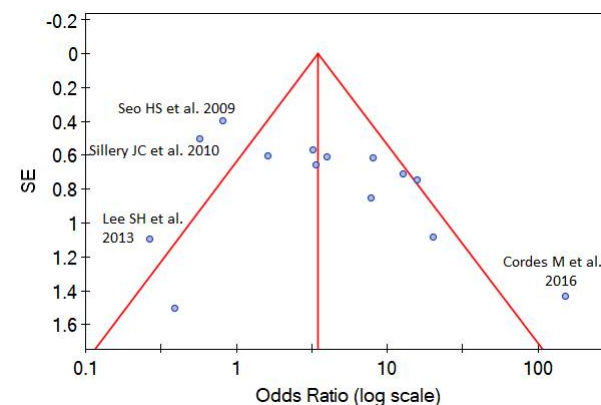

Test of heterogeneity  
 $I^2=75.3\%$ ,  $p<0.0001$

Odds Ratio (log -scale)

Egger's asymmetry test  
 $b$  Egger=2.70,  $p=0.0980$

\* Outlier

After exclusion of outliers: overall OR [95%CI] = 5.11 [2.9, 8.99], test of heterogeneity  $I^2=36.59\%$ ,  $p=0.1156$

Table S3b. The number of patients with true positive (TP), false negative (FN), false positive (FP), and true negative (TN) results presenting the estimates of sensitivity, specificity, positive predictive value (PPV), and negative predictive value (NPV with 95% confidence intervals of each study for irregular margins.

| Author                                                              | Year | n   | TP  | FN | FP | TN  | Sensitivity [95%CI]      | Specificity [95%CI]      | PPV [95%CI]              | NPV [95%CI]              |
|---------------------------------------------------------------------|------|-----|-----|----|----|-----|--------------------------|--------------------------|--------------------------|--------------------------|
| Seo HS et al. *                                                     | 2009 | 126 | 17  | 49 | 18 | 42  | 0.26 [0.16, 0.38]        | 0.70 [0.57, 0.81]        | 0.49 [0.31, 0.66]        | 0.46 [0.36, 0.57]        |
| Sillery JC et al. *                                                 | 2010 | 102 | 8   | 42 | 13 | 39  | 0.16 [0.07, 0.29]        | 0.75 [0.61, 0.86]        | 0.38 [0.18, 0.62]        | 0.48 [0.37, 0.60]        |
| Lee EK et al.                                                       | 2012 | 110 | 8   | 25 | 7  | 70  | 0.24 [0.11, 0.42]        | 0.91 [0.82, 0.96]        | 0.53 [0.27, 0.79]        | 0.74 [0.64, 0.82]        |
| Lai X et al.                                                        | 2013 | 111 | 8   | 29 | 1  | 73  | 0.22 [0.10, 0.38]        | 0.99 [0.93, 1.00]        | 0.89 [0.52, 1.00]        | 0.72 [0.62, 0.80]        |
| Lee KH et al.                                                       | 2013 | 75  | 0   | 11 | 6  | 58  | 0.00 [0.00, 0.28]        | 0.91 [0.81, 0.96]        | 0.00 [0.00, 0.46]        | 0.84 [0.73, 0.92]        |
| Lee SH et al. *                                                     | 2013 | 66  | 1   | 15 | 10 | 40  | 0.06 [0.00, 0.30]        | 0.80 [0.66, 0.90]        | 0.09 [0.00, 0.41]        | 0.73 [0.59, 0.84]        |
| Pompili G et al.                                                    | 2013 | 102 | 6   | 8  | 4  | 84  | 0.43 [0.18, 0.71]        | 0.95 [0.89, 0.99]        | 0.60 [0.26, 0.88]        | 0.91 [0.84, 0.96]        |
| Cordes M et al.                                                     | 2014 | 57  | 18  | 6  | 9  | 24  | 0.75 [0.53, 0.90]        | 0.73 [0.54, 0.87]        | 0.67 [0.46, 0.83]        | 0.80 [0.61, 0.92]        |
| Yoon JH et al.                                                      | 2014 | 177 | 5   | 20 | 9  | 143 | 0.20 [0.07, 0.41]        | 0.94 [0.89, 0.97]        | 0.36 [0.13, 0.65]        | 0.88 [0.82, 0.92]        |
| Cordes M et al. *                                                   | 2016 | 200 | 100 | 0  | 57 | 43  | 1.00 [0.96, 1.00]        | 0.43 [0.33, 0.53]        | 0.64 [0.56, 0.71]        | 1.00 [0.92, 1.00]        |
| Jeong SH et al.                                                     | 2016 | 178 | 4   | 18 | 19 | 137 | 0.18 [0.05, 0.40]        | 0.88 [0.82, 0.93]        | 0.17 [0.05, 0.39]        | 0.88 [0.82, 0.93]        |
| Kuru B et al.                                                       | 2018 | 139 | 7   | 44 | 4  | 84  | 0.14 [0.06, 0.26]        | 0.95 [0.89, 0.99]        | 0.64 [0.31, 0.89]        | 0.66 [0.57, 0.74]        |
| Kuo TC et al.                                                       | 2019 | 188 | 5   | 44 | 2  | 137 | 0.10 [0.03, 0.22]        | 0.99 [0.95, 1.00]        | 0.71 [0.29, 0.96]        | 0.76 [0.69, 0.82]        |
| Liu BJ et al.                                                       | 2020 | 90  | 11  | 17 | 3  | 59  | 0.39 [0.22, 0.59]        | 0.95 [0.87, 0.99]        | 0.79 [0.49, 0.95]        | 0.78 [0.67, 0.86]        |
| After outliers exclusion overall sensitivity, specificity, PPV, NPV |      |     |     |    |    |     | <b>0.24 [0.13, 0.37]</b> | <b>0.94 [0.90, 0.96]</b> | <b>0.53 [0.34, 0.71]</b> | <b>0.80 [0.74, 0.86]</b> |

\* Outlier

HSROC overall sensitivity [95%CI] = 0.24 [0.15, 0.37], HSROC overall specificity[95%CI] = 0.94 [0.89, 0.96] after exclusion of outliers

Table S4a. The results of odds ratios (OR) of each study in increasing the risk of nodule malignancy for hypoechogenicity markedly hypoechogenic nodules with 95% confidence intervals and forest plots.

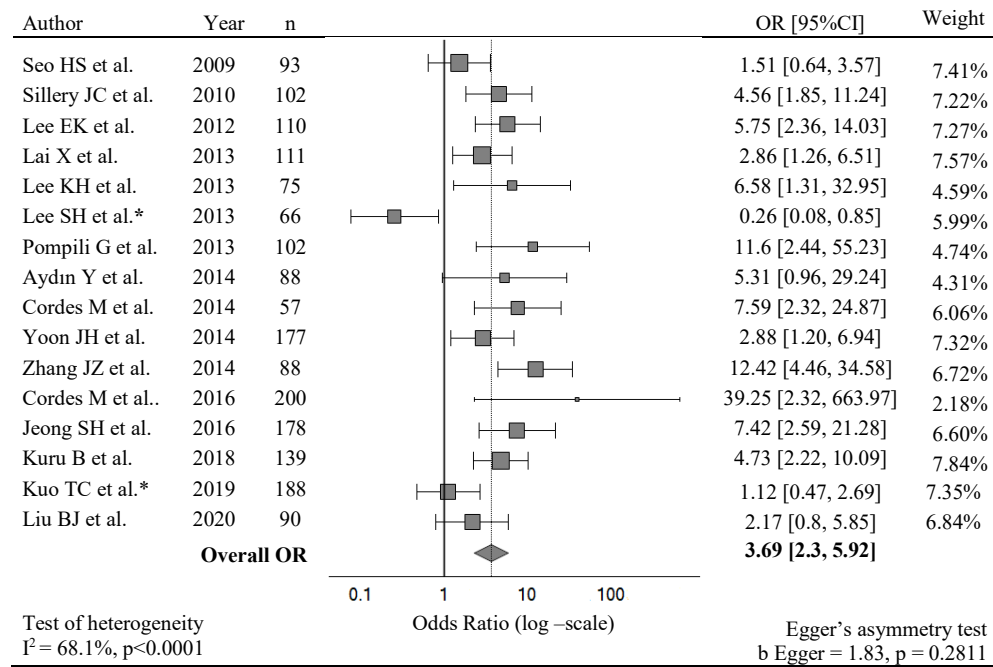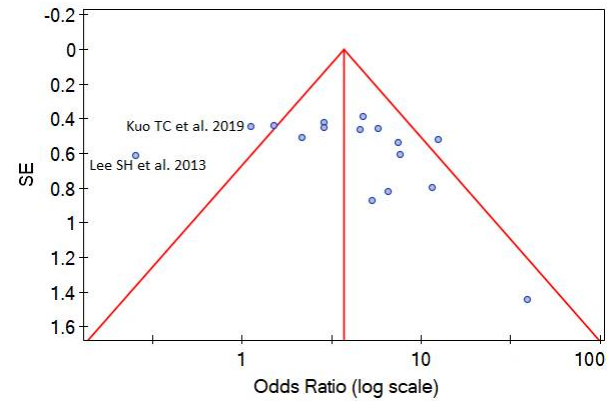

\*Outlier

After exclusion of outliers: **overall OR [95%CI] = 4.59 [3.23, 6.54]**, test of heterogeneity  $I^2 = 34.96\%$ ,  $p = 0.0955$

Table S4b. The number of patients with true positive (TP), false negative (FN), false positive (FP), and true negative (TN) results presenting the estimates of sensitivity, specificity, positive predictive value (PPV), and negative predictive value (NPV with 95% confidence intervals of each study for hypoechoogenicity or markedly hypoechoogenic nodules.

| Author                                                                        | Year | n   | TP  | FN | FP  | TN  | Sensitivity [95%CI]     | Specificity [95%CI]      | PPV [95%CI]              | NPV [95%CI]              |
|-------------------------------------------------------------------------------|------|-----|-----|----|-----|-----|-------------------------|--------------------------|--------------------------|--------------------------|
| Seo HS et al.                                                                 | 2009 | 93  | 16  | 17 | 23  | 37  | 0.48 [0.31, 0.66]       | 0.62 [0.48, 0.74]        | 0.41 [0.26, 0.58]        | 0.69 [0.54, 0.80]        |
| Sillery JC et al.                                                             | 2010 | 102 | 41  | 9  | 26  | 26  | 0.82 [0.69, 0.91]       | 0.50 [0.36, 0.64]        | 0.61 [0.49, 0.73]        | 0.74 [0.57, 0.88]        |
| Lee EK et al.                                                                 | 2012 | 110 | 23  | 10 | 22  | 55  | 0.70 [0.51, 0.84]       | 0.71 [0.60, 0.81]        | 0.51 [0.36, 0.66]        | 0.85 [0.74, 0.92]        |
| Lai X et al.                                                                  | 2013 | 111 | 24  | 13 | 29  | 45  | 0.65 [0.47, 0.80]       | 0.61 [0.49, 0.72]        | 0.45 [0.32, 0.60]        | 0.78 [0.65, 0.87]        |
| Lee KH et al.                                                                 | 2013 | 75  | 9   | 2  | 26  | 38  | 0.82 [0.48, 0.98]       | 0.59 [0.46, 0.71]        | 0.26 [0.12, 0.43]        | 0.95 [0.83, 0.99]        |
| Lee SH et al.*                                                                | 2013 | 66  | 5   | 11 | 32  | 18  | 0.31 [0.11, 0.59]       | 0.36 [0.23, 0.51]        | 0.14 [0.05, 0.29]        | 0.62 [0.42, 0.79]        |
| Pompili G et al.                                                              | 2013 | 102 | 12  | 2  | 30  | 58  | 0.86 [0.57, 0.98]       | 0.66 [0.55, 0.76]        | 0.29 [0.16, 0.45]        | 0.97 [0.88, 1.00]        |
| Aydin Y et al.                                                                | 2014 | 88  | 3   | 3  | 13  | 69  | 0.50 [0.12, 0.88]       | 0.84 [0.74, 0.91]        | 0.19 [0.04, 0.46]        | 0.96 [0.88, 0.99]        |
| Cordes M et al.                                                               | 2014 | 57  | 17  | 7  | 8   | 25  | 0.71 [0.49, 0.87]       | 0.76 [0.58, 0.89]        | 0.68 [0.46, 0.85]        | 0.78 [0.60, 0.91]        |
| Yoon JH et al.                                                                | 2014 | 177 | 16  | 9  | 58  | 94  | 0.64 [0.43, 0.82]       | 0.62 [0.54, 0.70]        | 0.22 [0.13, 0.33]        | 0.91 [0.84, 0.96]        |
| Zhang JZ et al.                                                               | 2014 | 88  | 26  | 10 | 9   | 43  | 0.72 [0.55, 0.86]       | 0.83 [0.70, 0.92]        | 0.74 [0.57, 0.88]        | 0.81 [0.68, 0.91]        |
| Cordes M et al.                                                               | 2016 | 200 | 100 | 0  | 84  | 16  | 1.00 [0.96, 1.00]       | 0.16 [0.09, 0.25]        | 0.54 [0.47, 0.62]        | 1.00 [0.79, 1.00]        |
| Jeong SH et al.                                                               | 2016 | 178 | 17  | 5  | 49  | 107 | 0.77 [0.55, 0.92]       | 0.69 [0.61, 0.76]        | 0.26 [0.16, 0.38]        | 0.96 [0.90, 0.99]        |
| Kuru B et al.                                                                 | 2018 | 139 | 28  | 23 | 18  | 70  | 0.55 [0.40, 0.69]       | 0.80 [0.70, 0.87]        | 0.61 [0.45, 0.75]        | 0.75 [0.65, 0.84]        |
| Kuo TC et al.*                                                                | 2019 | 188 | 41  | 8  | 114 | 25  | 0.84 [0.7, 0.93]        | 0.18 [0.12, 0.25]        | 0.26 [0.2, 0.34]         | 0.76 [0.58, 0.89]        |
| Liu BJ et al.                                                                 | 2020 | 90  | 21  | 7  | 36  | 26  | 0.75 [0.55, 0.89]       | 0.42 [0.3, 0.55]         | 0.37 [0.24, 0.51]        | 0.79 [0.61, 0.91]        |
| <b>Overall sensitivity, specificity, PPV, NPV (after outliers' exclusion)</b> |      |     |     |    |     |     | <b>0.74 [0.6, 0.86]</b> | <b>0.63 [0.53, 0.73]</b> | <b>0.44 [0.35, 0.53]</b> | <b>0.87 [0.81, 0.92]</b> |

\*Outlier

HSROC overall sensitivity[95%CI] = 0.74 [0.62, 0.84], HSROC overall specificity[95%CI] = 0.63 [0.53, 0.73] after exclusion of outliers

Table S5a. The results of odds ratios (OR) of each study in increasing the risk of nodule malignancy for irregular shape with 95% confidence intervals and forest plots.

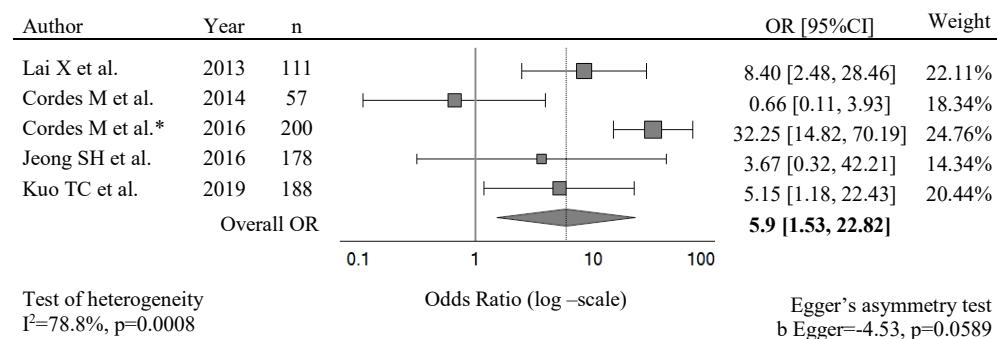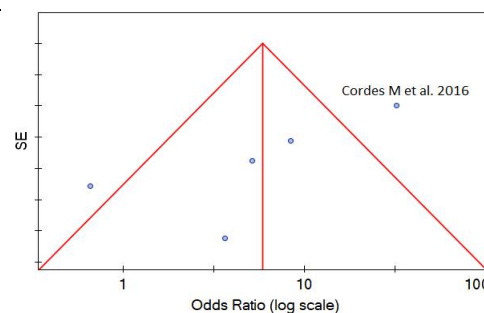

\* Outlier  
After exclusion of outliers: **overall OR [95%CI] = 3.6 [1.19, 10.92]**, test of heterogeneity  $I^2=45.0\%$ ,  $p=0.1415$

Table S5b. The number of patients with true positive (TP), false negative (FN), false positive (FP), and true negative (TN) results presenting the estimates of sensitivity, specificity, positive predictive value (PPV), and negative predictive value (NPV with 95% confidence intervals of each study for irregular shape.

| Author                                                                        | Year | n   | TP | FN | FP | TN  | Sensitivity [95%CI]      | Specificity [95%CI]      | PPV [95%CI]             | NPV [95%CI]              |
|-------------------------------------------------------------------------------|------|-----|----|----|----|-----|--------------------------|--------------------------|-------------------------|--------------------------|
| Lai X et al.                                                                  | 2013 | 111 | 12 | 25 | 4  | 70  | 0.32 [0.18, 0.50]        | 0.95 [0.87, 0.99]        | 0.75 [0.48, 0.93]       | 0.74 [0.64, 0.82]        |
| Cordes M et al.                                                               | 2014 | 57  | 2  | 22 | 4  | 29  | 0.08 [0.01, 0.27]        | 0.88 [0.72, 0.97]        | 0.33 [0.04, 0.78]       | 0.57 [0.42, 0.71]        |
| Cordes M et al. *                                                             | 2016 | 200 | 86 | 14 | 16 | 84  | 0.86 [0.78, 0.92]        | 0.84 [0.75, 0.91]        | 0.84 [0.76, 0.91]       | 0.86 [0.77, 0.92]        |
| Jeong SH et al.                                                               | 2016 | 178 | 1  | 21 | 2  | 154 | 0.05 [0.00, 0.23]        | 0.99 [0.95, 1.00]        | 0.33 [0.01, 0.91]       | 0.88 [0.82, 0.92]        |
| Kuo TC et al.                                                                 | 2019 | 188 | 5  | 44 | 3  | 136 | 0.10 [0.03, 0.22]        | 0.98 [0.94, 1.00]        | 0.63 [0.24, 0.91]       | 0.76 [0.69, 0.82]        |
| <b>Overall sensitivity, specificity, PPV, NPV (after outliers' exclusion)</b> |      |     |    |    |    |     | <b>0.13 [0.04, 0.26]</b> | <b>0.97 [0.92, 0.99]</b> | <b>0.60 [0.38, 0.8]</b> | <b>0.75 [0.63, 0.86]</b> |

\* Outlier  
HSROC overall sensitivity [95%CI] = 0.13 [0.05, 0.27], HSROC overall specificity [95%CI] = 0.97 [0.92, 0.98] after exclusion of outliers

Table S6a. The results of odds ratios (OR) of each study in increasing the risk of nodule malignancy for lack of halo or presence of thick halo with 95% confidence intervals and forest plots.

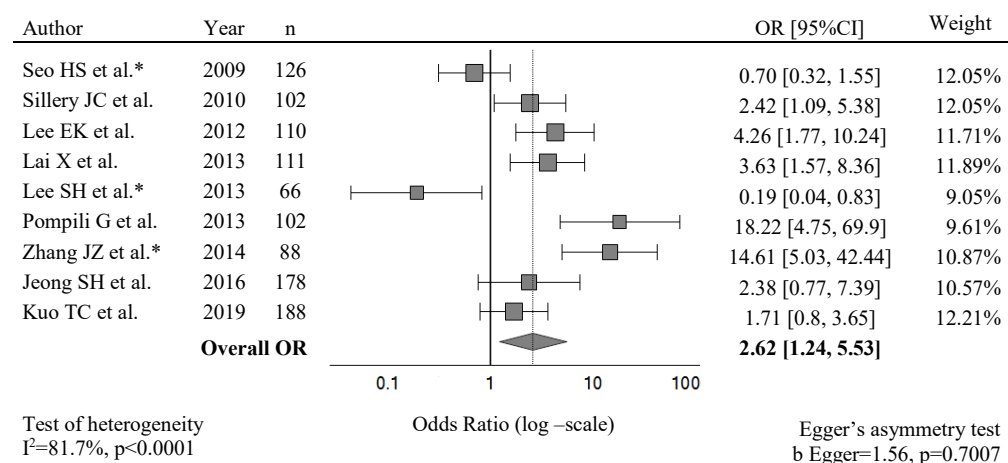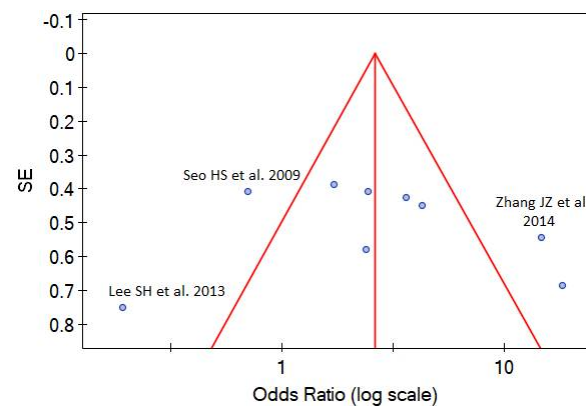

\* Outlier  
 After exclusion of outliers: **overall OR [95%CI] = 3.34 [1.95, 5.73]**, test of heterogeneity  $I^2=51.2\%$ ,  $p=0.0685$

Table S6b. The number of patients with true positive (TP), false negative (FN), false positive (FP), and true negative (TN) results presenting the estimates of sensitivity, specificity, positive predictive value (PPV), and negative predictive value (NPV with 95% confidence intervals of each study for lack of halo or presence of thick halo.

| Author                                                                     | Year | n   | TP | FN | FP  | TN | Sensitivity [95%CI]      | Specificity [95%CI]      | PPV [95%CI]              | NPV [95%CI]              |
|----------------------------------------------------------------------------|------|-----|----|----|-----|----|--------------------------|--------------------------|--------------------------|--------------------------|
| Seo HS et al. *                                                            | 2009 | 126 | 46 | 20 | 46  | 14 | 0.70 [0.57, 0.80]        | 0.23 [0.13, 0.36]        | 0.50 [0.39, 0.61]        | 0.41 [0.25, 0.59]        |
| Sillery JC et al.                                                          | 2010 | 102 | 32 | 18 | 22  | 30 | 0.64 [0.49, 0.77]        | 0.58 [0.43, 0.71]        | 0.59 [0.45, 0.72]        | 0.63 [0.47, 0.76]        |
| Lee EK et al.                                                              | 2012 | 110 | 23 | 10 | 27  | 50 | 0.70 [0.51, 0.84]        | 0.65 [0.53, 0.75]        | 0.46 [0.32, 0.61]        | 0.83 [0.71, 0.92]        |
| Lai X et al.                                                               | 2013 | 111 | 25 | 12 | 27  | 47 | 0.68 [0.50, 0.82]        | 0.64 [0.52, 0.74]        | 0.48 [0.34, 0.62]        | 0.80 [0.67, 0.89]        |
| Lee SH et al. *                                                            | 2013 | 66  | 11 | 5  | 46  | 4  | 0.69 [0.41, 0.89]        | 0.08 [0.02, 0.19]        | 0.19 [0.10, 0.32]        | 0.44 [0.14, 0.79]        |
| Pompili G et al.                                                           | 2013 | 102 | 8  | 6  | 6   | 82 | 0.57 [0.29, 0.82]        | 0.93 [0.86, 0.97]        | 0.57 [0.29, 0.82]        | 0.93 [0.86, 0.97]        |
| Zhang JZ et al.                                                            | 2014 | 88  | 25 | 11 | 7   | 45 | 0.69 [0.52, 0.84]        | 0.87 [0.74, 0.94]        | 0.78 [0.60, 0.91]        | 0.80 [0.68, 0.90]        |
| Jeong SH et al.                                                            | 2016 | 178 | 18 | 4  | 102 | 54 | 0.82 [0.60, 0.95]        | 0.35 [0.27, 0.43]        | 0.15 [0.09, 0.23]        | 0.93 [0.83, 0.98]        |
| Kuo TC et al.                                                              | 2019 | 188 | 38 | 11 | 93  | 46 | 0.78 [0.63, 0.88]        | 0.33 [0.25, 0.42]        | 0.29 [0.21, 0.38]        | 0.81 [0.68, 0.90]        |
| After outliers exclusion <b>overall sensitivity, specificity, PPV, NPV</b> |      |     |    |    |     |    | <b>0.70 [0.64, 0.76]</b> | <b>0.63 [0.43, 0.82]</b> | <b>0.46 [0.29, 0.63]</b> | <b>0.83 [0.75, 0.90]</b> |

\* Outlier  
 HSROC overall sensitivity and specificity are missing because of estimated variance components too close to the boundary of the parameter space

Table S7a. The results of odds ratios (OR) of each study in increasing the risk of nodule malignancy when macrocalcifications, eggshell or rim calcifications are present in the ultrasound with 95% confidence intervals and forest plots.

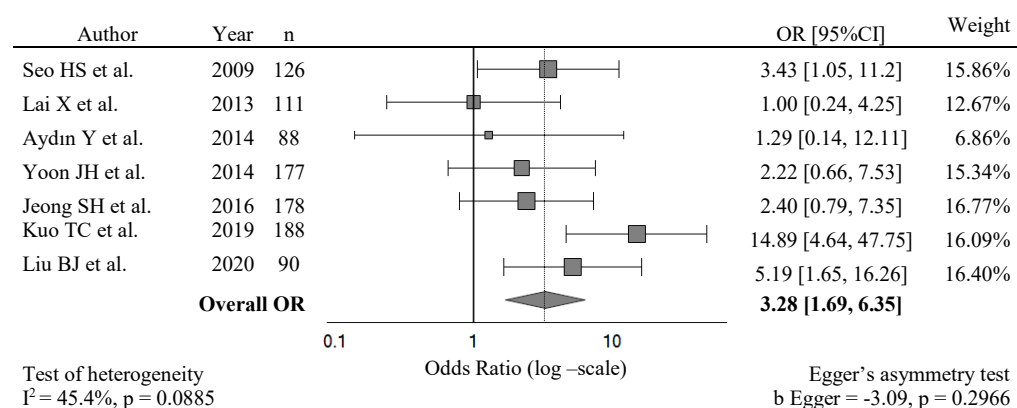

Table S7b. The number of patients with true positive (TP), false negative (FN), false positive (FP), and true negative (TN) results presenting the estimates of sensitivity, specificity, positive predictive value (PPV), and negative predictive value (NPV with 95% confidence intervals of each study for macrocalcifications, eggshell or rim calcifications in the ultrasound.

| Author                                            | Year | n   | TP | FN | FP | TN  | Sensitivity [95%CI]      | Specificity [95%CI]      | PPV [95%CI]              | NPV [95%CI]              |
|---------------------------------------------------|------|-----|----|----|----|-----|--------------------------|--------------------------|--------------------------|--------------------------|
| Seo HS et al.                                     | 2009 | 126 | 13 | 53 | 4  | 56  | 0.20 [0.11, 0.31]        | 0.93 [0.84, 0.98]        | 0.76 [0.5, 0.93]         | 0.51 [0.42, 0.61]        |
| Lai X et al.                                      | 2013 | 111 | 3  | 34 | 6  | 68  | 0.08 [0.02, 0.22]        | 0.92 [0.83, 0.97]        | 0.33 [0.07, 0.7]         | 0.67 [0.57, 0.76]        |
| Aydin Y et al.                                    | 2014 | 88  | 1  | 5  | 11 | 71  | 0.17 [0.00, 0.64]        | 0.87 [0.77, 0.93]        | 0.08 [0.00, 0.38]        | 0.93 [0.85, 0.98]        |
| Yoon JH et al.                                    | 2014 | 177 | 4  | 21 | 12 | 140 | 0.16 [0.05, 0.36]        | 0.92 [0.87, 0.96]        | 0.25 [0.07, 0.52]        | 0.87 [0.81, 0.92]        |
| Jeong SH et al.                                   | 2016 | 178 | 5  | 17 | 17 | 139 | 0.23 [0.08, 0.45]        | 0.89 [0.83, 0.94]        | 0.23 [0.08, 0.45]        | 0.89 [0.83, 0.94]        |
| Kuo TC et al.                                     | 2019 | 188 | 15 | 34 | 4  | 135 | 0.31 [0.18, 0.45]        | 0.97 [0.93, 0.99]        | 0.79 [0.54, 0.94]        | 0.8 [0.73, 0.86]         |
| Liu BJ et al.                                     | 2020 | 90  | 10 | 18 | 6  | 56  | 0.36 [0.19, 0.56]        | 0.9 [0.8, 0.96]          | 0.63 [0.35, 0.85]        | 0.76 [0.64, 0.85]        |
| <b>Overall sensitivity, specificity, PPV, NPV</b> |      |     |    |    |    |     | <b>0.21 [0.14, 0.29]</b> | <b>0.92 [0.89, 0.95]</b> | <b>0.44 [0.22, 0.67]</b> | <b>0.79 [0.68, 0.88]</b> |

HSROC overall sensitivity [95%CI] = 0.2 [0.14, 0.28], HSROC overall specificity [95%CI] = 0.92 [0.89, 0.94]



Table S8a. The results of odds ratios (OR) of each study in increasing the risk of nodule malignancy when any type of calcifications is present in the ultrasound with 95% confidence intervals and forest plots.

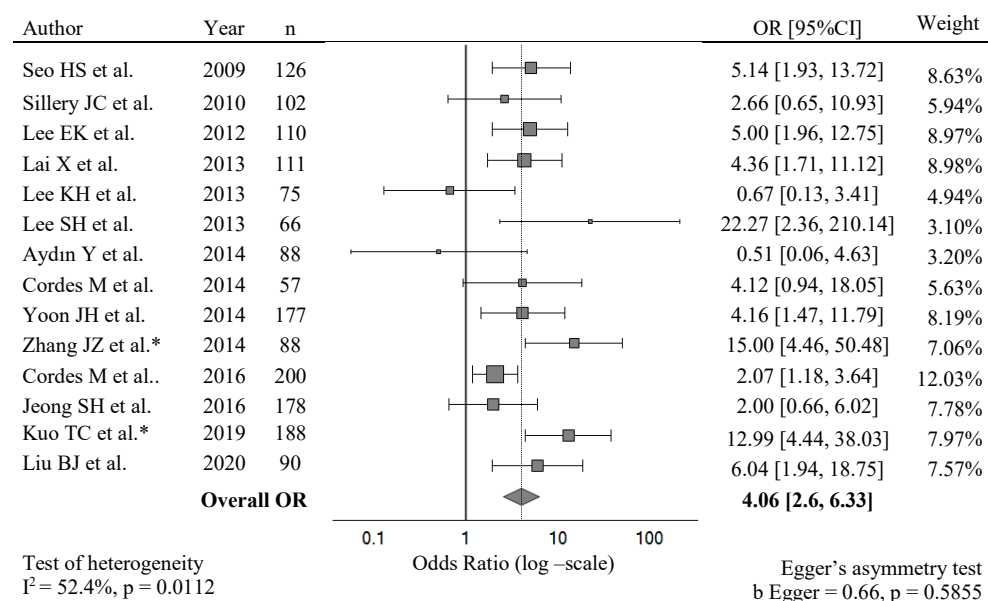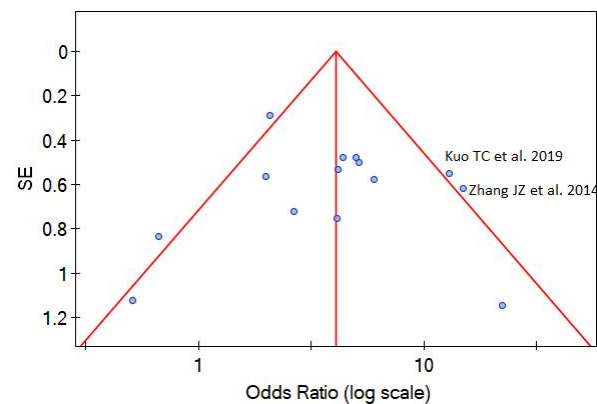

\*Outlier

After exclusion of outliers: **overall OR [95%CI] = 3.26 [2.2, 4.83]**, test of heterogeneity  $I^2=30.6\%$ ,  $p=0.1469$

Table S8b. The number of patients with true positive (TP), false negative (FN), false positive (FP), and true negative (TN) results presenting the estimates of sensitivity, specificity, positive predictive value (PPV), and negative predictive value (NPV with 95% confidence intervals of each study for all types of calcifications in the ultrasound.

| Author                                                                        | Year | n   | TP | FN | FP | TN  | Sensitivity [95%CI]      | Specificity [95%CI]      | PPV [95%CI]              | NPV [95%CI]              |
|-------------------------------------------------------------------------------|------|-----|----|----|----|-----|--------------------------|--------------------------|--------------------------|--------------------------|
| Seo HS et al.                                                                 | 2009 | 126 | 24 | 42 | 6  | 54  | 0.36 [0.25, 0.49]        | 0.90 [0.79, 0.96]        | 0.80 [0.61, 0.92]        | 0.56 [0.46, 0.66]        |
| Sillery JC et al.                                                             | 2010 | 102 | 7  | 43 | 3  | 49  | 0.14 [0.06, 0.27]        | 0.94 [0.84, 0.99]        | 0.70 [0.35, 0.93]        | 0.53 [0.43, 0.64]        |
| Lee EK et al.                                                                 | 2012 | 110 | 15 | 18 | 11 | 66  | 0.45 [0.28, 0.64]        | 0.86 [0.76, 0.93]        | 0.58 [0.37, 0.77]        | 0.79 [0.68, 0.87]        |
| Lai X et al.                                                                  | 2013 | 111 | 15 | 22 | 10 | 64  | 0.41 [0.25, 0.58]        | 0.86 [0.77, 0.93]        | 0.60 [0.39, 0.79]        | 0.74 [0.64, 0.83]        |
| Lee KH et al.                                                                 | 2013 | 75  | 2  | 9  | 16 | 48  | 0.18 [0.02, 0.52]        | 0.75 [0.63, 0.85]        | 0.11 [0.01, 0.35]        | 0.84 [0.72, 0.93]        |
| Lee SH et al.                                                                 | 2013 | 66  | 5  | 11 | 1  | 49  | 0.31 [0.11, 0.59]        | 0.98 [0.89, 1.00]        | 0.83 [0.36, 1.00]        | 0.82 [0.70, 0.90]        |
| Aydin Y et al.                                                                | 2014 | 88  | 1  | 5  | 23 | 59  | 0.17 [0.00, 0.64]        | 0.72 [0.61, 0.81]        | 0.04 [0.00, 0.21]        | 0.92 [0.83, 0.97]        |
| Cordes M et al.                                                               | 2014 | 57  | 7  | 17 | 3  | 30  | 0.29 [0.13, 0.51]        | 0.91 [0.76, 0.98]        | 0.70 [0.35, 0.93]        | 0.64 [0.49, 0.77]        |
| Yoon JH et al.                                                                | 2014 | 177 | 7  | 18 | 13 | 139 | 0.28 [0.12, 0.49]        | 0.91 [0.86, 0.95]        | 0.35 [0.15, 0.59]        | 0.89 [0.82, 0.93]        |
| Zhang JZ et al.                                                               | 2014 | 88  | 20 | 16 | 4  | 48  | 0.56 [0.38, 0.72]        | 0.92 [0.81, 0.98]        | 0.83 [0.63, 0.95]        | 0.75 [0.63, 0.85]        |
| Cordes M et al.                                                               | 2016 | 200 | 57 | 43 | 39 | 61  | 0.57 [0.47, 0.67]        | 0.61 [0.51, 0.71]        | 0.59 [0.49, 0.69]        | 0.59 [0.49, 0.68]        |
| Jeong SH et al.                                                               | 2016 | 178 | 5  | 17 | 20 | 136 | 0.23 [0.08, 0.45]        | 0.87 [0.81, 0.92]        | 0.2 [0.07, 0.41]         | 0.89 [0.83, 0.93]        |
| Kuo TC et al.                                                                 | 2019 | 188 | 16 | 33 | 5  | 134 | 0.33 [0.20, 0.48]        | 0.96 [0.92, 0.99]        | 0.76 [0.53, 0.92]        | 0.80 [0.73, 0.86]        |
| Liu BJ et al.                                                                 | 2020 | 90  | 11 | 17 | 6  | 56  | 0.39 [0.22, 0.59]        | 0.90 [0.80, 0.96]        | 0.65 [0.38, 0.86]        | 0.77 [0.65, 0.86]        |
| <b>Overall sensitivity, specificity, PPV, NPV (after outliers' exclusion)</b> |      |     |    |    |    |     | <b>0.35 [0.27, 0.43]</b> | <b>0.88 [0.82, 0.92]</b> | <b>0.54 [0.39, 0.69]</b> | <b>0.76 [0.69, 0.83]</b> |

HSROC overall sensitivity [95%CI] = 0.36 [0.29, 0.43], HSROC overall specificity [95%CI] = 0.89 [0.83, 0.92]

Table S9a. The results of odds ratios (OR) of each study in increasing the risk of nodule malignancy for solitary nodule with 95% confidence intervals and forest plots.

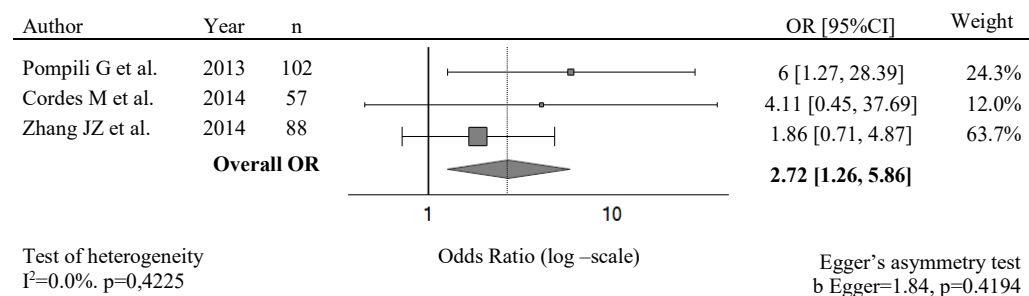

Table S9b. The number of patients with true positive (TP), false negative (FN), false positive (FP), and true negative (TN) results presenting the estimates of sensitivity, specificity, positive predictive value (PPV), and negative predictive value (NPV) with 95% confidence intervals of each study for solitary nodule.

| Author                                            | Year | n   | TP | FN | FP | TN | Sensitivity [95%CI]      | Specificity [95%CI]      | PPV [95%CI]              | NPV [95%CI]              |
|---------------------------------------------------|------|-----|----|----|----|----|--------------------------|--------------------------|--------------------------|--------------------------|
| Pompili G et al.                                  | 2013 | 102 | 12 | 2  | 44 | 44 | 0.86 [0.57, 0.98]        | 0.50 [0.39, 0.61]        | 0.21 [0.12, 0.34]        | 0.96 [0.85, 0.99]        |
| Cordes M et al.                                   | 2014 | 57  | 23 | 1  | 28 | 5  | 0.96 [0.79, 1.00]        | 0.15 [0.05, 0.32]        | 0.45 [0.31, 0.60]        | 0.83 [0.36, 1.00]        |
| Zhang JZ et al.                                   | 2014 | 88  | 12 | 24 | 11 | 41 | 0.33 [0.19, 0.51]        | 0.79 [0.65, 0.89]        | 0.52 [0.31, 0.73]        | 0.63 [0.50, 0.75]        |
| <b>Overall sensitivity, specificity, PPV, NPV</b> |      |     |    |    |    |    | <b>0.74 [0.27, 1.00]</b> | <b>0.48 [0.17, 0.80]</b> | <b>0.38 [0.20, 0.58]</b> | <b>0.83 [0.51, 1.00]</b> |

HSROC overall sensitivity and specificity are missing because HSROC requires a minimum of four studies

Table S10a. The results of odds ratios (OR) of each study in increasing the risk of nodule malignancy for taller than wide feature in the ultrasound with 95% confidence intervals and forest plots.

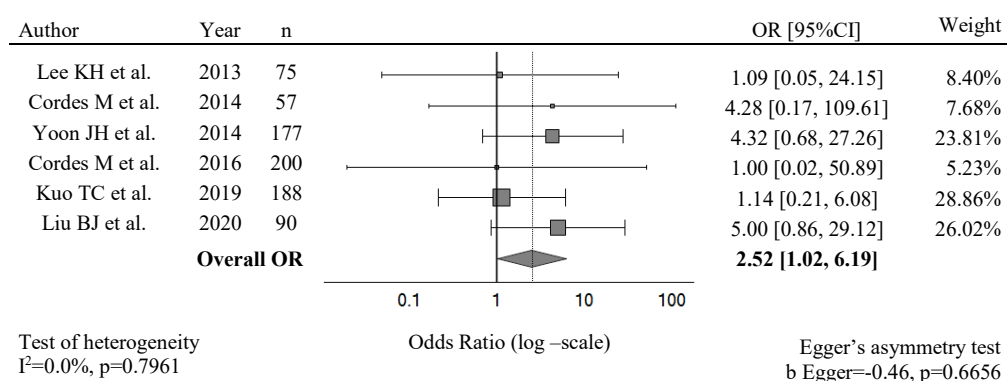

Table S10b. The number of patients with true positive (TP), false negative (FN), false positive (FP), and true negative (TN) results presenting the estimates of sensitivity, specificity, positive predictive value (PPV), and negative predictive value (NPV) with 95% confidence intervals of each study for taller than wide feature in the ultrasound

| Author                                            | Year | n   | TP | FN  | FP | TN  | Sensitivity [95%CI]      | Specificity [95%CI]      | PPV [95%CI]              | NPV [95%CI]              |
|---------------------------------------------------|------|-----|----|-----|----|-----|--------------------------|--------------------------|--------------------------|--------------------------|
| Lee KH et al.                                     | 2013 | 75  | 0  | 11  | 2  | 62  | 0.00 [0.00, 0.28]        | 0.97 [0.89, 1.00]        | 0.00 [0.00, 0.97]        | 0.85 [0.75, 0.92]        |
| Cordes M et al.                                   | 2014 | 57  | 1  | 23  | 0  | 33  | 0.04 [0.00, 0.21]        | 1.00 [0.89, 1.00]        | 1.00 [0.02, 1.00]        | 0.59 [0.45, 0.72]        |
| Yoon JH et al.                                    | 2014 | 177 | 2  | 23  | 3  | 149 | 0.08 [0.01, 0.26]        | 0.98 [0.94, 1.00]        | 0.40 [0.05, 0.85]        | 0.87 [0.81, 0.91]        |
| Cordes M et al.                                   | 2016 | 200 | 0  | 100 | 0  | 100 | 0.00 [0.00, 0.04]        | 1.00 [0.96, 1.00]        | NA                       | 0.50 [0.43, 0.57]        |
| Kuo TC et al.                                     | 2019 | 188 | 2  | 47  | 5  | 134 | 0.04 [0.00, 0.14]        | 0.96 [0.92, 0.99]        | 0.29 [0.04, 0.71]        | 0.74 [0.67, 0.80]        |
| Liu BJ et al.                                     | 2020 | 90  | 4  | 24  | 2  | 60  | 0.14 [0.04, 0.33]        | 0.97 [0.89, 1.00]        | 0.67 [0.22, 0.96]        | 0.71 [0.61, 0.81]        |
| <b>Overall sensitivity, specificity, PPV, NPV</b> |      |     |    |     |    |     | <b>0.03 [0.00, 0.10]</b> | <b>0.98 [0.97, 1.00]</b> | <b>0.41 [0.14, 0.70]</b> | <b>0.72 [0.58, 0.84]</b> |

NA – not applicable

HSROC overall sensitivity and specificity are missing because one or more studies have TP+FP=0 or TN+FN=0.

Table S11a. The results of odds ratios (OR) of each study in increasing the risk of nodule malignancy for solid or mainly solid structure with 95% confidence intervals and forest plots.

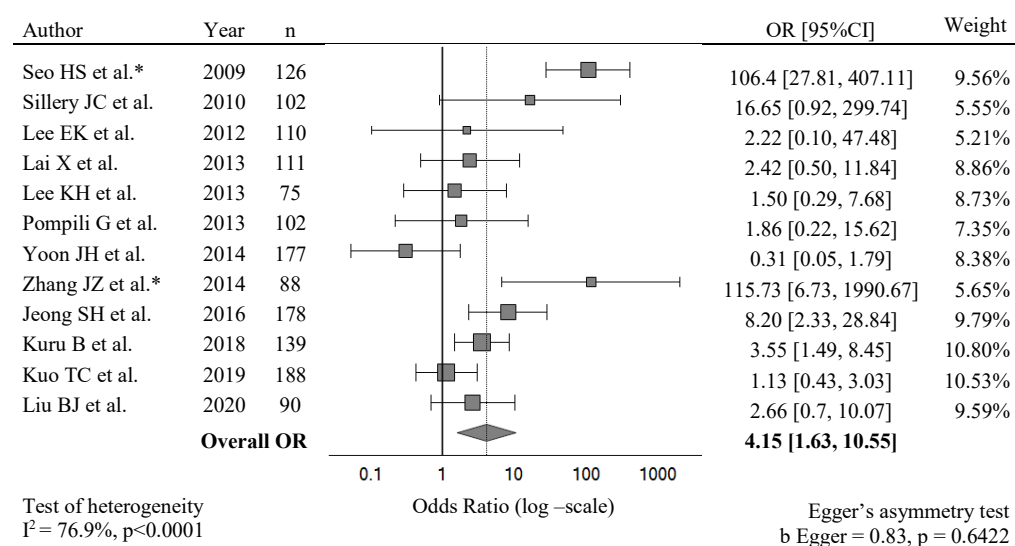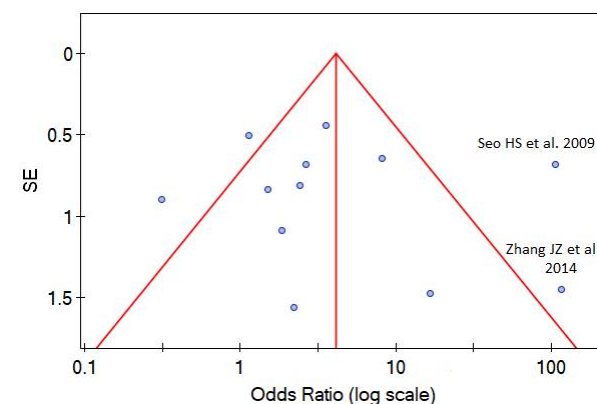

\* Outlier

After exclusion of outliers: **overall OR [95%CI] = 2.3 [1.27, 4.17]**, test of heterogeneity  $I^2 = 35.8\%$ ,  $p = 0.1217$

Table S11b. The number of patients with true positive (TP), false negative (FN), false positive (FP), and true negative (TN) results presenting the estimates of sensitivity, specificity, positive predictive value (PPV), and negative predictive value (NPV with 95% confidence intervals of each study for solid or mainly solid structure.

| Author                                                                        | Year | n   | TP | FN | FP  | TN | Sensitivity [95%CI]      | Specificity [95%CI]      | PPV [95%CI]              | NPV [95%CI]             |
|-------------------------------------------------------------------------------|------|-----|----|----|-----|----|--------------------------|--------------------------|--------------------------|-------------------------|
| Seo HS et al. *                                                               | 2009 | 126 | 56 | 10 | 3   | 57 | 0.85 [0.74, 0.92]        | 0.95 [0.86, 0.99]        | 0.95 [0.86, 0.99]        | 0.85 [0.74, 0.93]       |
| Sillery JC et al.                                                             | 2010 | 102 | 50 | 0  | 45  | 7  | 1.00 [0.93, 1.00]        | 0.13 [0.06, 0.26]        | 0.53 [0.42, 0.63]        | 1.00 [0.59, 1.00]       |
| Lee EK et al.                                                                 | 2012 | 110 | 33 | 0  | 75  | 2  | 1.00 [0.89, 1.00]        | 0.03 [0.00, 0.09]        | 0.31 [0.22, 0.40]        | 1.00 [0.03, 1.00]       |
| Lai X et al.                                                                  | 2013 | 111 | 35 | 2  | 65  | 9  | 0.95 [0.82, 0.99]        | 0.12 [0.06, 0.22]        | 0.35 [0.26, 0.45]        | 0.82 [0.48, 0.98]       |
| Lee KH et al.                                                                 | 2013 | 75  | 9  | 2  | 48  | 16 | 0.82 [0.48, 0.98]        | 0.25 [0.15, 0.37]        | 0.16 [0.07, 0.28]        | 0.89 [0.65, 0.99]       |
| Pompili G et al.                                                              | 2013 | 102 | 13 | 1  | 77  | 11 | 0.93 [0.66, 1.00]        | 0.13 [0.06, 0.21]        | 0.14 [0.08, 0.23]        | 0.92 [0.62, 1.00]       |
| Yoon JH et al.                                                                | 2014 | 177 | 23 | 2  | 148 | 4  | 0.92 [0.74, 0.99]        | 0.03 [0.01, 0.07]        | 0.13 [0.09, 0.19]        | 0.67 [0.22, 0.96]       |
| Zhang JZ et al. *                                                             | 2014 | 88  | 36 | 0  | 20  | 32 | 1.00 [0.90, 1.00]        | 0.62 [0.47, 0.75]        | 0.64 [0.50, 0.77]        | 1.00 [0.89, 1.00]       |
| Jeong SH et al.                                                               | 2016 | 178 | 19 | 3  | 68  | 88 | 0.86 [0.65, 0.97]        | 0.56 [0.48, 0.64]        | 0.22 [0.14, 0.32]        | 0.97 [0.91, 0.99]       |
| Kuru B et al.                                                                 | 2018 | 139 | 43 | 8  | 53  | 35 | 0.84 [0.71, 0.93]        | 0.40 [0.29, 0.51]        | 0.45 [0.35, 0.55]        | 0.81 [0.67, 0.92]       |
| Kuo TC et al.                                                                 | 2019 | 188 | 43 | 6  | 120 | 19 | 0.88 [0.75, 0.95]        | 0.14 [0.08, 0.21]        | 0.26 [0.20, 0.34]        | 0.76 [0.55, 0.91]       |
| Liu BJ et al.                                                                 | 2020 | 90  | 25 | 3  | 47  | 15 | 0.89 [0.72, 0.98]        | 0.24 [0.14, 0.37]        | 0.35 [0.24, 0.47]        | 0.83 [0.59, 0.96]       |
| <b>Overall sensitivity, specificity, PPV, NPV (after outliers' exclusion)</b> |      |     |    |    |     |    | <b>0.93 [0.87, 0.97]</b> | <b>0.18 [0.08, 0.31]</b> | <b>0.28 [0.20, 0.37]</b> | <b>0.9 [0.81, 0.96]</b> |

\* Outlier

HSROC overall sensitivity [95%CI] = 0.92 [0.87, 0.96], HSROC overall specificity [95%CI] = 0.15 [0.08, 0.27] after exclusion of outliers

Table S12a. The results of odds ratios (OR) of each study in increasing the risk of nodule malignancy for size over 4 cm with 95% confidence intervals and forest plots.

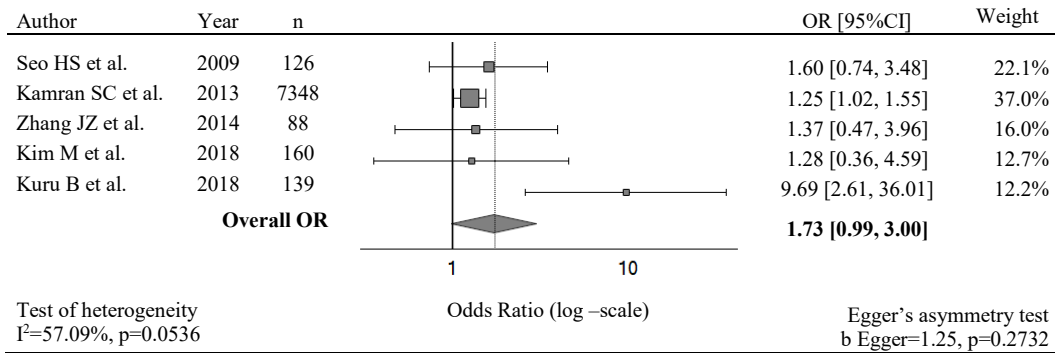

Table S12b. The number of patients with true positive (TP), false negative (FN), false positive (FP), and true negative (TN) results presenting the estimates of sensitivity, specificity, positive predictive value (PPV), and negative predictive value (NPV with 95% confidence intervals of each study for size over 4 cm.

| Author                                            | Year | n    | TP  | FN  | FP  | TN   | Sensitivity [95%CI]      | Specificity [95%CI]      | PPV [95%CI]              | NPV [95%CI]              |
|---------------------------------------------------|------|------|-----|-----|-----|------|--------------------------|--------------------------|--------------------------|--------------------------|
| Seo HS et al.                                     | 2009 | 126  | 23  | 43  | 15  | 45   | 0.35 [0.24, 0.48]        | 0.75 [0.62, 0.85]        | 0.61 [0.43, 0.76]        | 0.51 [0.40, 0.62]        |
| Kamran SC et al.                                  | 2013 | 7348 | 116 | 811 | 657 | 5764 | 0.13 [0.10, 0.15]        | 0.90 [0.89, 0.90]        | 0.15 [0.13, 0.18]        | 0.88 [0.87, 0.88]        |
| Zhang JZ et al.                                   | 2014 | 88   | 8   | 28  | 9   | 43   | 0.22 [0.10, 0.39]        | 0.83 [0.70, 0.92]        | 0.47 [0.23, 0.72]        | 0.61 [0.48, 0.72]        |
| Kim M et al.                                      | 2018 | 160  | 4   | 46  | 7   | 103  | 0.08 [0.02, 0.19]        | 0.94 [0.87, 0.97]        | 0.36 [0.11, 0.69]        | 0.69 [0.61, 0.76]        |
| Kuru B et al.                                     | 2018 | 139  | 13  | 38  | 3   | 85   | 0.25 [0.14, 0.40]        | 0.97 [0.90, 0.99]        | 0.81 [0.54, 0.96]        | 0.69 [0.60, 0.77]        |
| <b>Overall sensitivity, specificity, PPV, NPV</b> |      |      |     |     |     |      | <b>0.19 [0.11, 0.30]</b> | <b>0.89 [0.83, 0.94]</b> | <b>0.47 [0.17, 0.77]</b> | <b>0.69 [0.51, 0.84]</b> |

HSROC overall sensitivity[95%CI] = 0.18 [0.11, 0.28], HSROC Overall specificity [95%CI] = 0.89 [0.81, 0.94] after exclusion of outliers

Table S13a. The results of odds ratios (OR) of each study in increasing the risk of nodule malignancy for heterogeoenous echostructure in the ultrasound with 95% confidence intervals and forest plots.

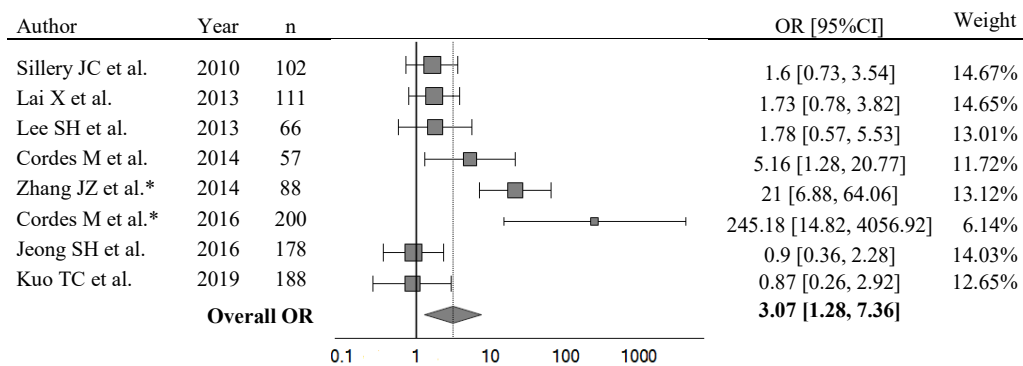

Test of heterogeneity  
 $I^2 = 79.9\%$ ,  $p < 0.0001$

Odds Ratio (log -scale)

Egger's asymmetry test  
 b Egger = 4.47,  $p = 0.0976$

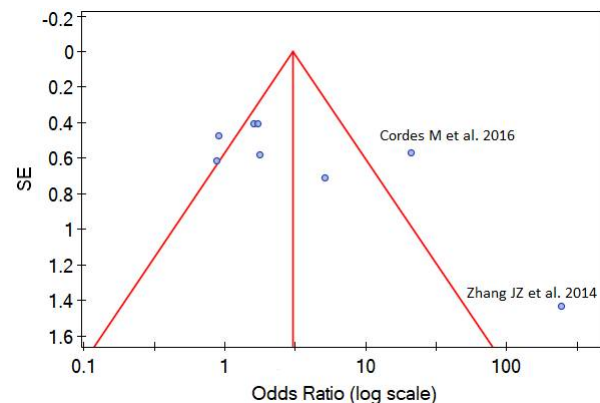

\* Outlier

After exclusion of outliers: overall OR [95%CI] = 1.53 [1.02, 2.3], test of heterogeneity  $I^2 = 3.32\%$ ,  $p = 0.3953$

Table S13b. The number of patients with true positive (TP), false negative (FN), false positive (FP), and true negative (TN) results presenting the estimates of sensitivity, specificity, positive predictive value (PPV), and negative predictive value (NPV with 95% confidence intervals of each study for heterogeneous echostructure.

| Author                                                                        | Year | n   | TP  | FN | FP  | TN | Sensitivity [95%CI]      | Specificity [95%CI]      | PPV [95%CI]             | NPV [95%CI]              |
|-------------------------------------------------------------------------------|------|-----|-----|----|-----|----|--------------------------|--------------------------|-------------------------|--------------------------|
| Sillery JC et al.                                                             | 2010 | 102 | 24  | 26 | 19  | 33 | 0.48 [0.34, 0.63]        | 0.63 [0.49, 0.76]        | 0.56 [0.40, 0.71]       | 0.56 [0.42, 0.69]        |
| Lai X et al.                                                                  | 2013 | 111 | 20  | 17 | 30  | 44 | 0.54 [0.37, 0.71]        | 0.59 [0.47, 0.71]        | 0.40 [0.26, 0.55]       | 0.72 [0.59, 0.83]        |
| Lee SH et al.                                                                 | 2013 | 66  | 9   | 7  | 21  | 29 | 0.56 [0.30, 0.80]        | 0.58 [0.43, 0.72]        | 0.30 [0.15, 0.49]       | 0.81 [0.64, 0.92]        |
| Cordes M et al. *                                                             | 2014 | 57  | 21  | 3  | 19  | 14 | 0.88 [0.68, 0.97]        | 0.42 [0.25, 0.61]        | 0.53 [0.36, 0.68]       | 0.82 [0.57, 0.96]        |
| Zhang JZ et al. *                                                             | 2014 | 88  | 30  | 6  | 10  | 42 | 0.83 [0.67, 0.94]        | 0.81 [0.67, 0.90]        | 0.75 [0.59, 0.87]       | 0.88 [0.75, 0.95]        |
| Cordes M et al.                                                               | 2016 | 200 | 100 | 0  | 45  | 55 | 1.00 [0.96, 1.00]        | 0.55 [0.45, 0.65]        | 0.69 [0.61, 0.76]       | 1.00 [0.94, 1.00]        |
| Jeong SH et al.                                                               | 2016 | 178 | 14  | 8  | 103 | 53 | 0.64 [0.41, 0.83]        | 0.34 [0.27, 0.42]        | 0.12 [0.07, 0.19]       | 0.87 [0.76, 0.94]        |
| Kuo TC et al.*                                                                | 2019 | 188 | 45  | 4  | 129 | 10 | 0.92 [0.80, 0.98]        | 0.07 [0.04, 0.13]        | 0.26 [0.20, 0.33]       | 0.71 [0.42, 0.92]        |
| <b>Overall sensitivity, specificity, PPV, NPV (after outliers' exclusion)</b> |      |     |     |    |     |    | <b>0.69 [0.33, 0.96]</b> | <b>0.53 [0.41, 0.65]</b> | <b>0.4 [0.16, 0.67]</b> | <b>0.82 [0.63, 0.96]</b> |

\*Outlier

HSROC overall sensitivity [95%CI] = 0.77 [0.34, 0.96], HSROC overall specificity [95%CI] = 0.53 [0.43, 0.63] after exclusion of outliers

Table S14a. The results of odds ratios (OR) of each study in increasing the risk of nodule malignancy for Doppler pattern 3 or more with 95% confidence intervals and forest plots.

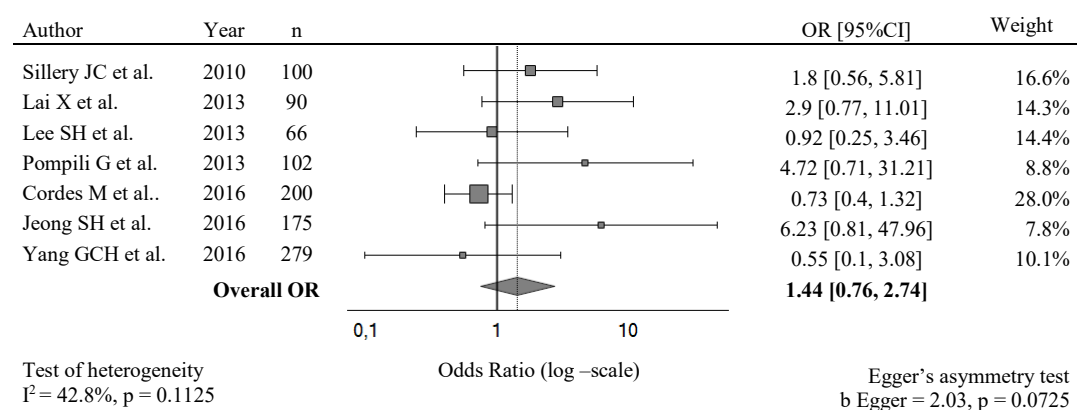

Table S15b. The number of patients with true positive (TP), false negative (FN), false positive (FP), and true negative (TN) results presenting the estimates of sensitivity, specificity, positive predictive value (PPV), and negative predictive value (NPV) with 95% confidence intervals of each study for Doppler pattern 3 or more.

| Author                                            | Year | n   | TP | FN | FP  | TN | Sensitivity [95%CI]      | Specificity [95%CI]      | PPV [95%CI]              | NPV [95%CI]              |
|---------------------------------------------------|------|-----|----|----|-----|----|--------------------------|--------------------------|--------------------------|--------------------------|
| Sillery JC et al.                                 | 2010 | 100 | 43 | 5  | 43  | 9  | 0.90 [0.77, 0.97]        | 0.17 [0.08, 0.30]        | 0.50 [0.39, 0.61]        | 0.64 [0.35, 0.87]        |
| Lai X et al.                                      | 2013 | 90  | 28 | 3  | 45  | 14 | 0.90 [0.74, 0.98]        | 0.24 [0.14, 0.37]        | 0.38 [0.27, 0.50]        | 0.82 [0.57, 0.96]        |
| Lee SH et al.                                     | 2013 | 66  | 4  | 19 | 8   | 35 | 0.17 [0.05, 0.39]        | 0.81 [0.67, 0.92]        | 0.33 [0.10, 0.65]        | 0.65 [0.51, 0.77]        |
| Pompili G et al.                                  | 2013 | 102 | 2  | 12 | 3   | 85 | 0.14 [0.02, 0.43]        | 0.97 [0.90, 0.99]        | 0.40 [0.05, 0.85]        | 0.88 [0.79, 0.93]        |
| Cordes M et al.                                   | 2016 | 200 | 29 | 71 | 36  | 64 | 0.29 [0.20, 0.39]        | 0.64 [0.54, 0.73]        | 0.45 [0.32, 0.57]        | 0.47 [0.39, 0.56]        |
| Jeong SH et al.                                   | 2016 | 175 | 21 | 1  | 118 | 35 | 0.95 [0.77, 1.00]        | 0.23 [0.16, 0.30]        | 0.15 [0.10, 0.22]        | 0.97 [0.85, 1.00]        |
| Yang GCH et al.                                   | 2016 | 279 | 4  | 2  | 214 | 59 | 0.67 [0.22, 0.96]        | 0.22 [0.17, 0.27]        | 0.02 [0.01, 0.05]        | 0.97 [0.89, 1.00]        |
| <b>Overall sensitivity, specificity, PPV, NPV</b> |      |     |    |    |     |    | <b>0.60 [0.29, 0.88]</b> | <b>0.48 [0.23, 0.74]</b> | <b>0.28 [0.10, 0.51]</b> | <b>0.80 [0.61, 0.94]</b> |

HSROC overall sensitivity[95%CI] = 0.59 [0.24, 0.87], HSROC overall specificity[95%CI] = 0.49 [0.22, 0.76]
